# Supplementary material for: Convenient preparation of Pd/RGO catalyst for the efficient hydrodechlorination of various chlorophenols
Source: Royal Society of Chemistry journal article supplement (doi:10.1039/c5nj02349a), 2015-10-27
Supplement: c5nj02349a1.pdf [file c5nj02349a1.pdf]

## Supporting Information

### Convenient Preparation of Pd/RGO Catalyst for the Efficient Hydrodechlorination of Various Chlorophenols

Weidong Jiang<sup>a,\*</sup>, Zhen Xiang<sup>a</sup>, Bin Xu<sup>a</sup>, Xiaojing Li<sup>b</sup>, Fuan Liu<sup>a</sup> and Guangyin Fan<sup>b,\*\*</sup>

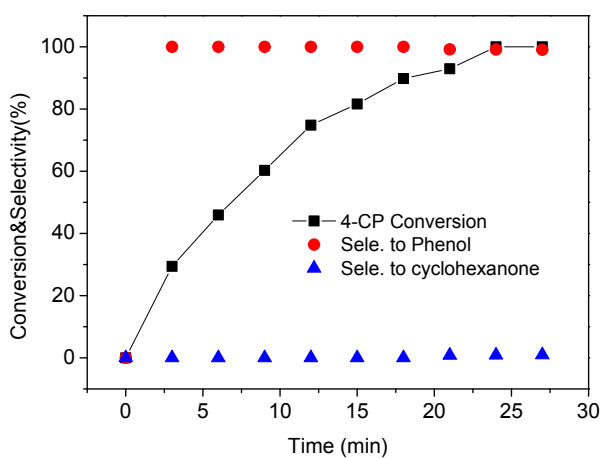

Figure S1. HDC of 4-CP catalyzed by Pd/RGO at 40 °C

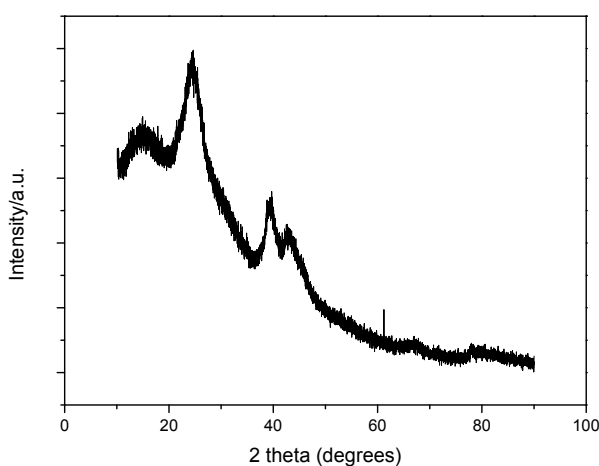

Figure S2. XRD pattern of Pd/RGO recycled at five times.

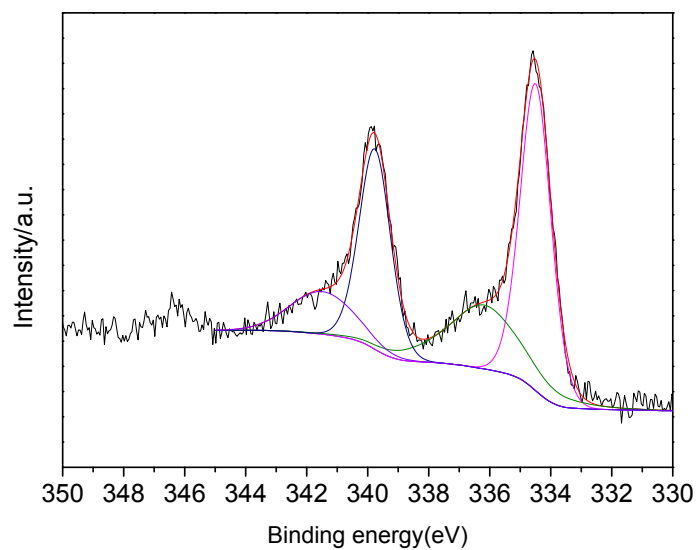

**Figure S3.** XPS spectrum of Pd/RGO recycled at five times.

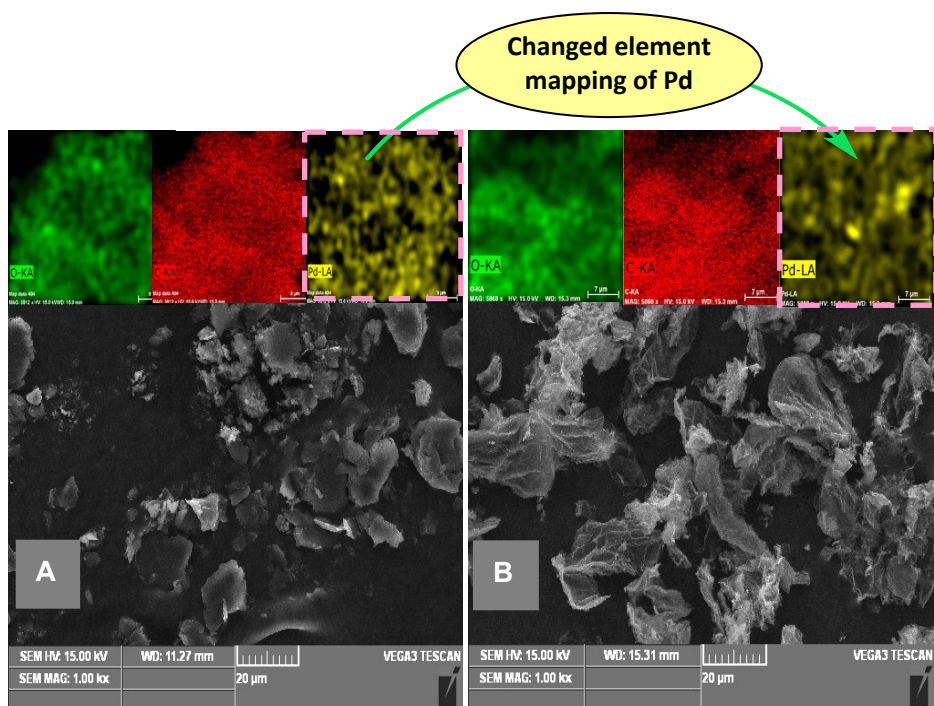

**Figure S4.** SEM images and element mappings of the initiate Pd/RGO catalyst (A) and the recycled Pd/RGO catalyst after five runs (B).
